# Supplementary material for: A tryst of ‘blood pressure control- sex- comorbidities’: the odyssey of basic public health services in Yunnan in quest for truth
Source: Springer Nature journal article supplement (doi:10.1186/s12889-023-17157-7), 2024-02-16

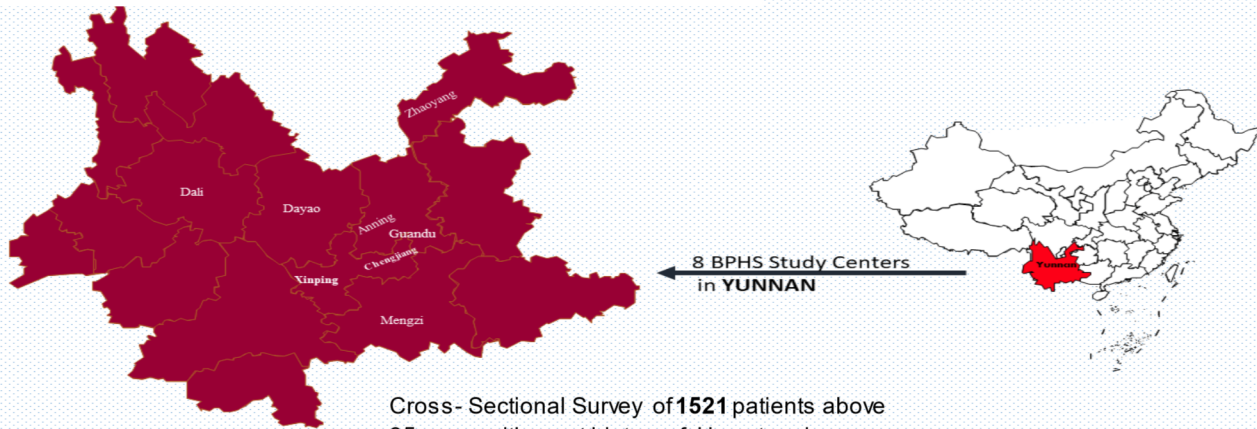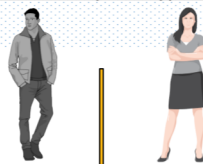

Each participant consents to :-

1. Answer the questionnaire of social, educational, financial ,demographic status,previous health condition and medication history.

2. Physical Examinations performed include- Blood pressure check,Height,Weight,BMI.

3.Biochemical tests:- Lipid profile, Glucose level,Renal Profile

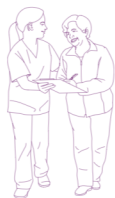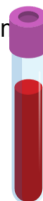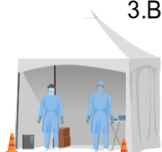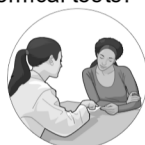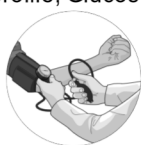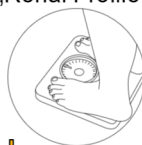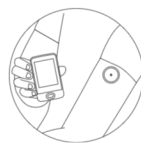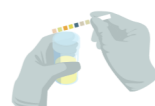

With ID number, a longitudinal platform created to match and link to central BPHS administrative system of China.

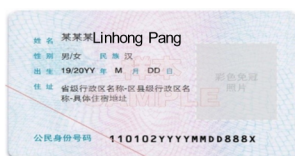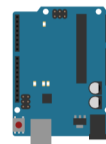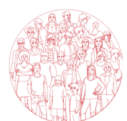

**BPHS GROUP**  
(received BPHS services)  
n= 1011

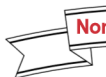

**Non- BPHS Group**  
(did not receive BPHS services)  
n= 510

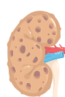

**Hypertension WITH Co-morbidity**  
n = 722

**Hypertension WITHOUT Co-morbidity**  
n= 289

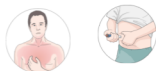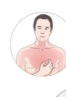

**Hypertension WITH Co-morbidity**  
n = 354

**Hypertension WITHOUT Co-morbidity**  
n = 156

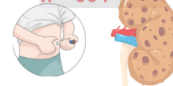

Supplement: MOESM2 [file 26741974]
