# Supplementary material for: A tryst of ‘blood pressure control- sex- comorbidities’: the odyssey of basic public health services in Yunnan in quest for truth
Source: Springer Nature journal article supplement (doi:10.1186/s12889-023-17157-7), 2024-02-16

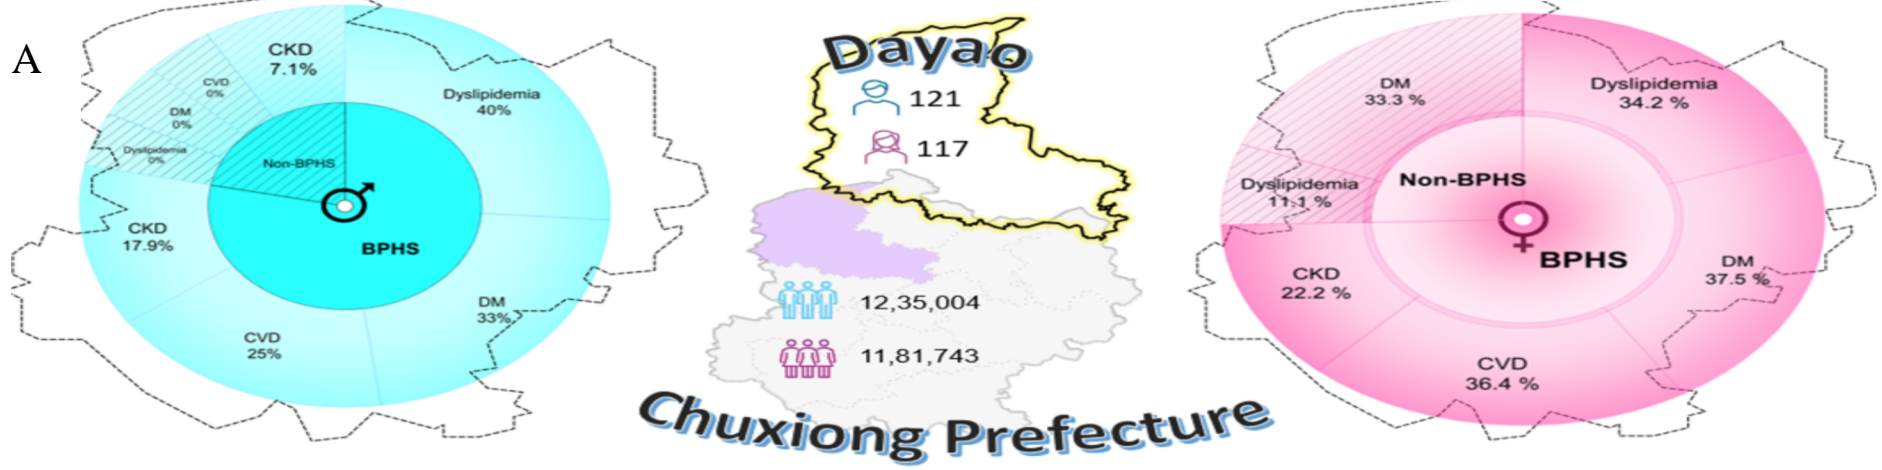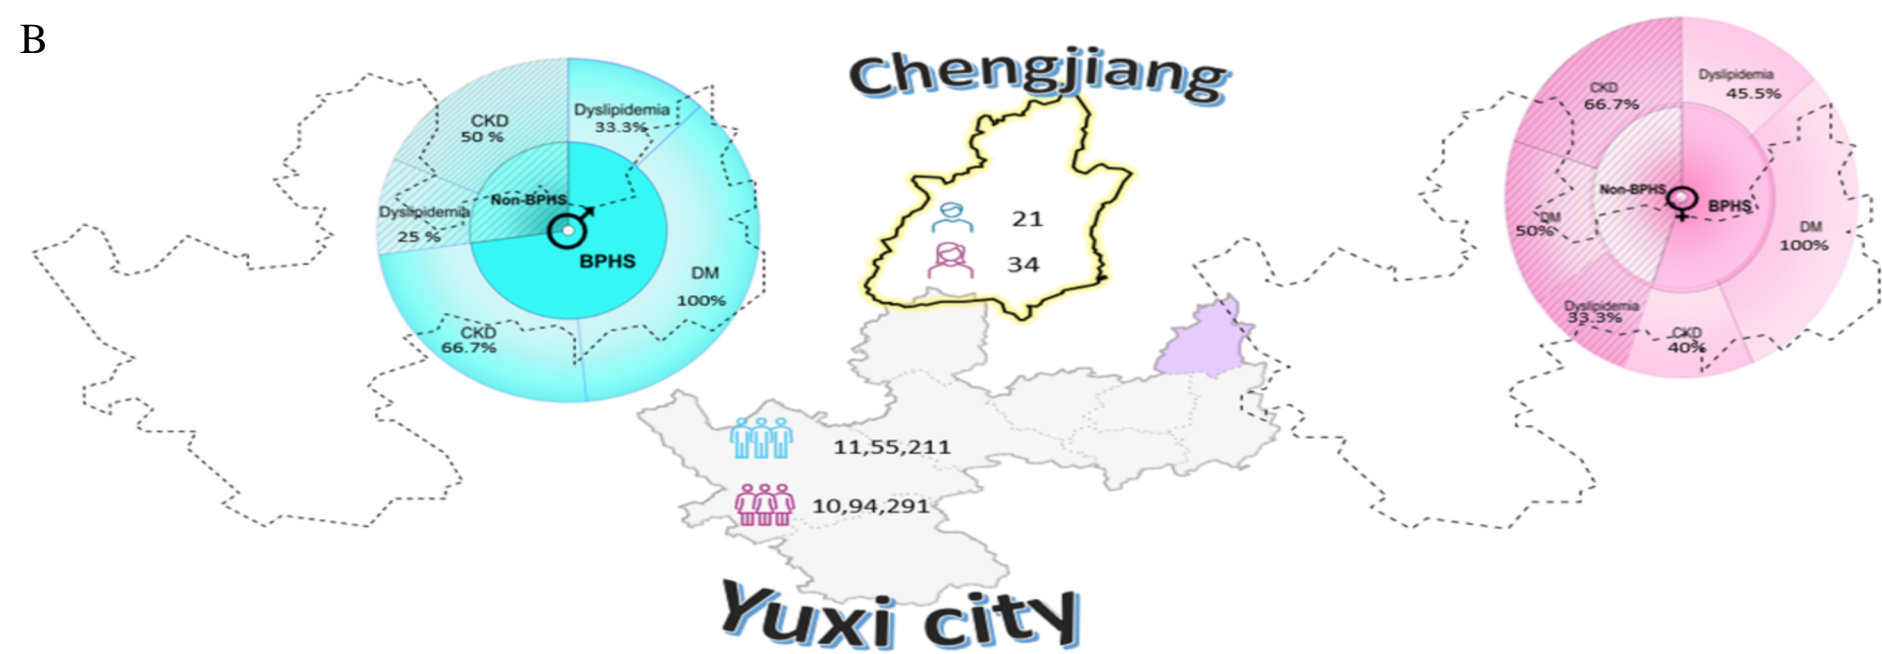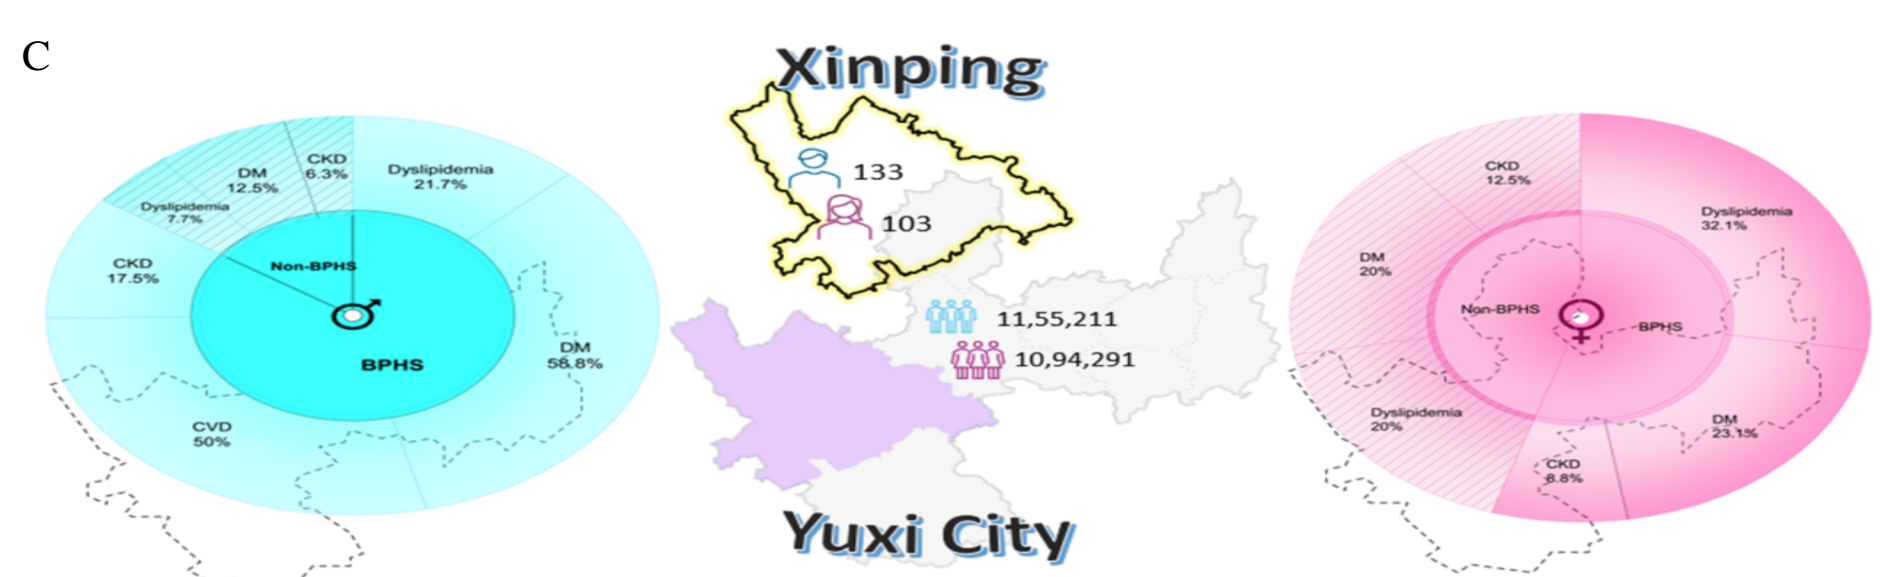

D

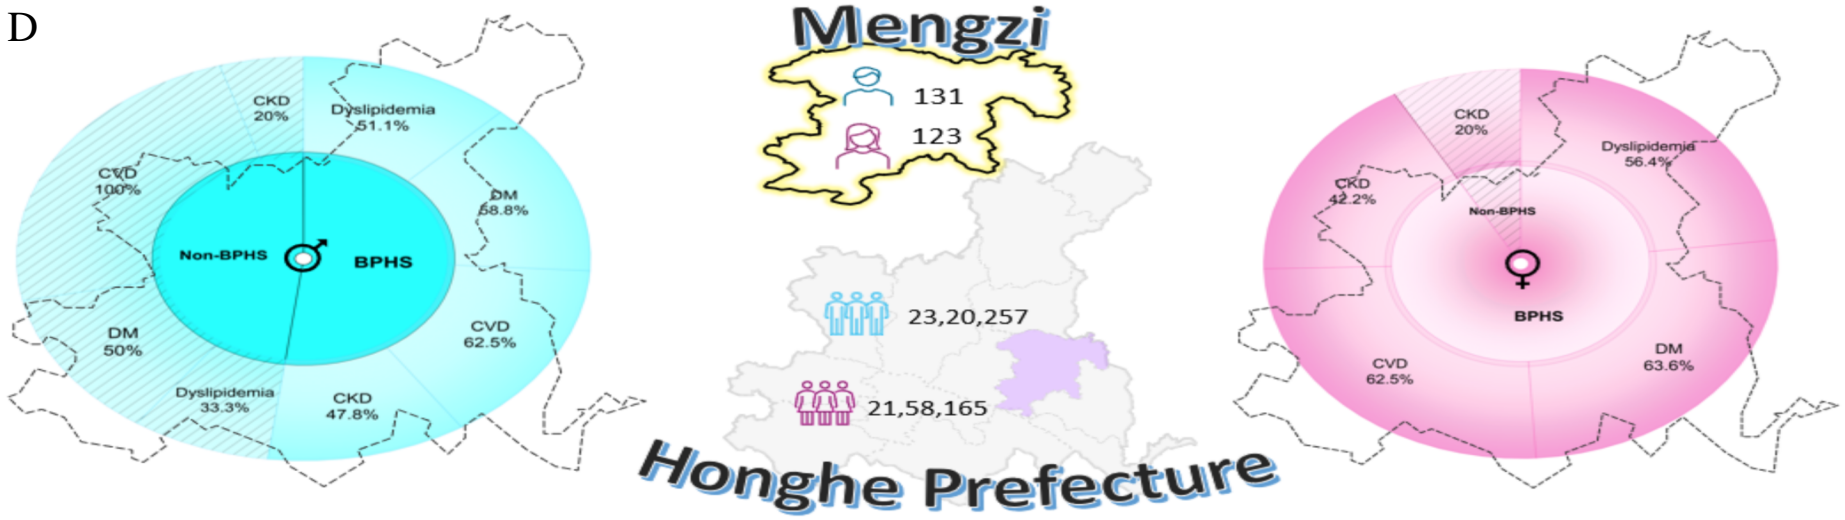

E

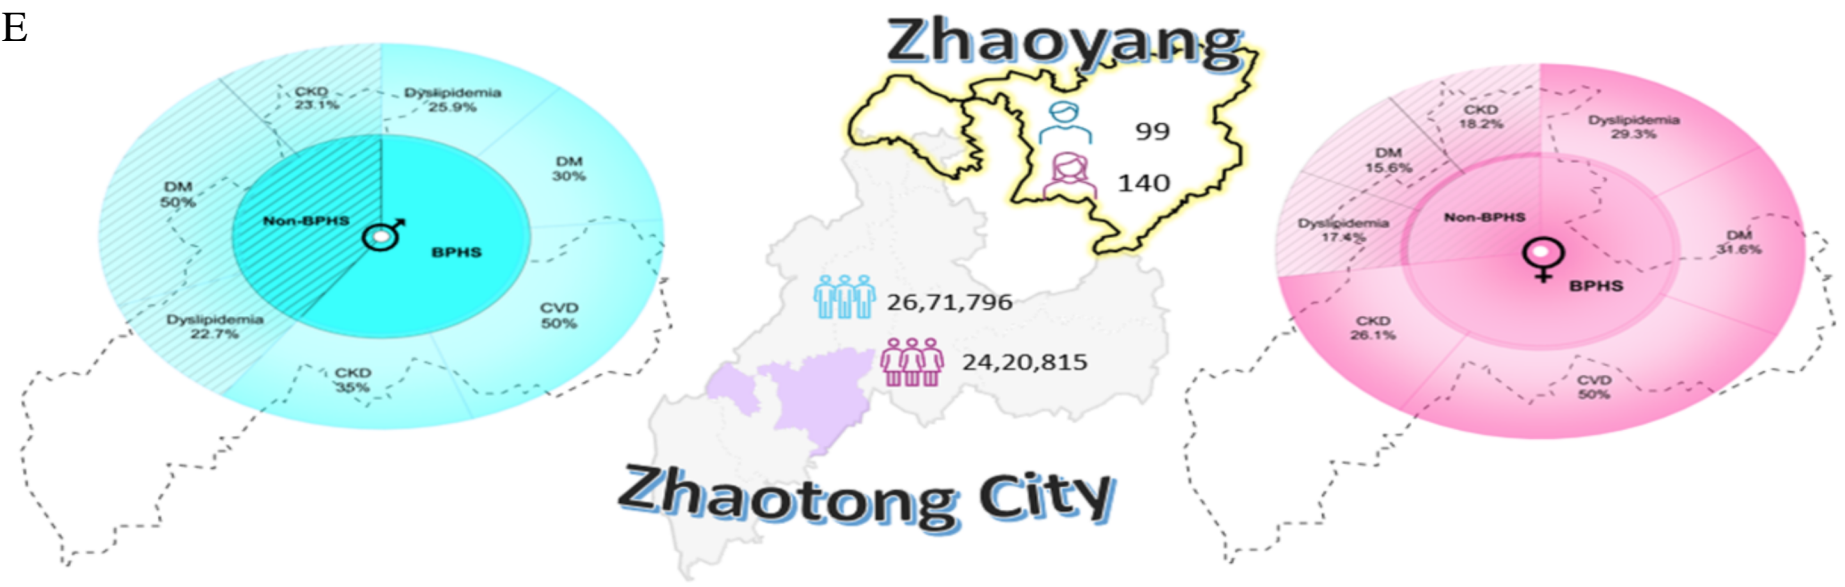

F

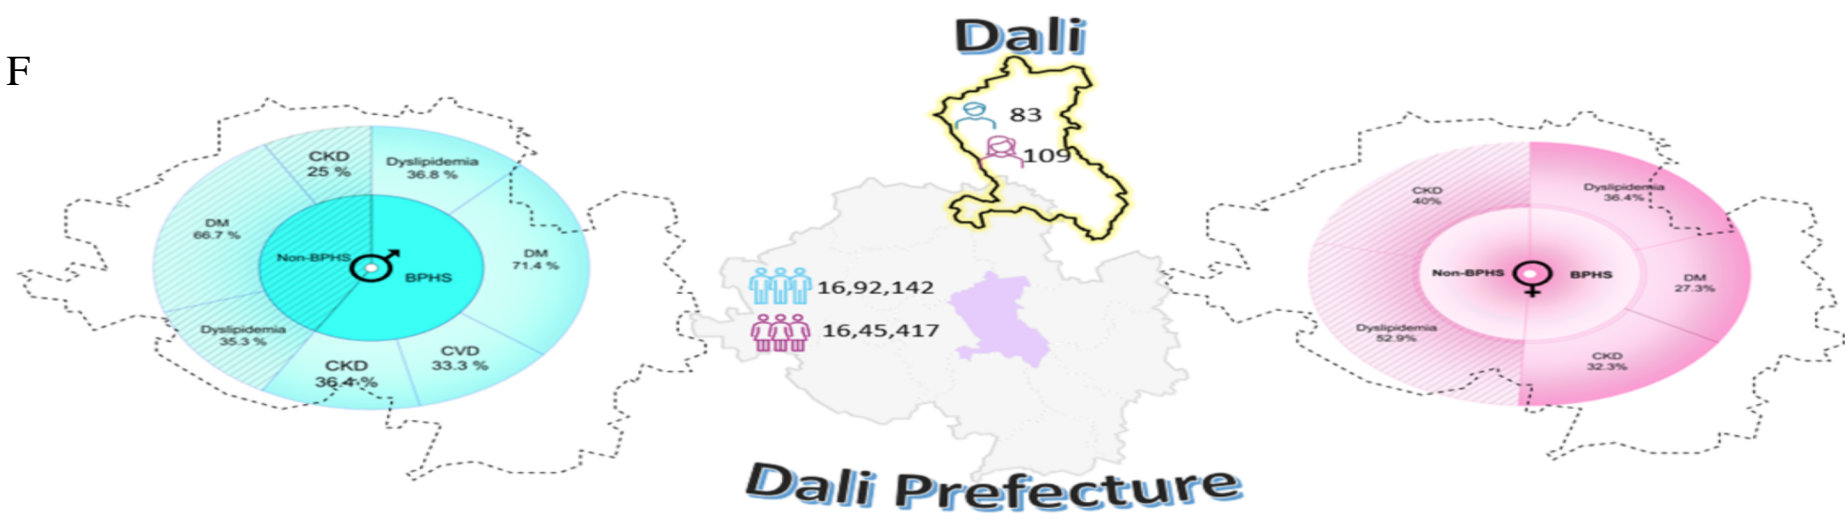

G

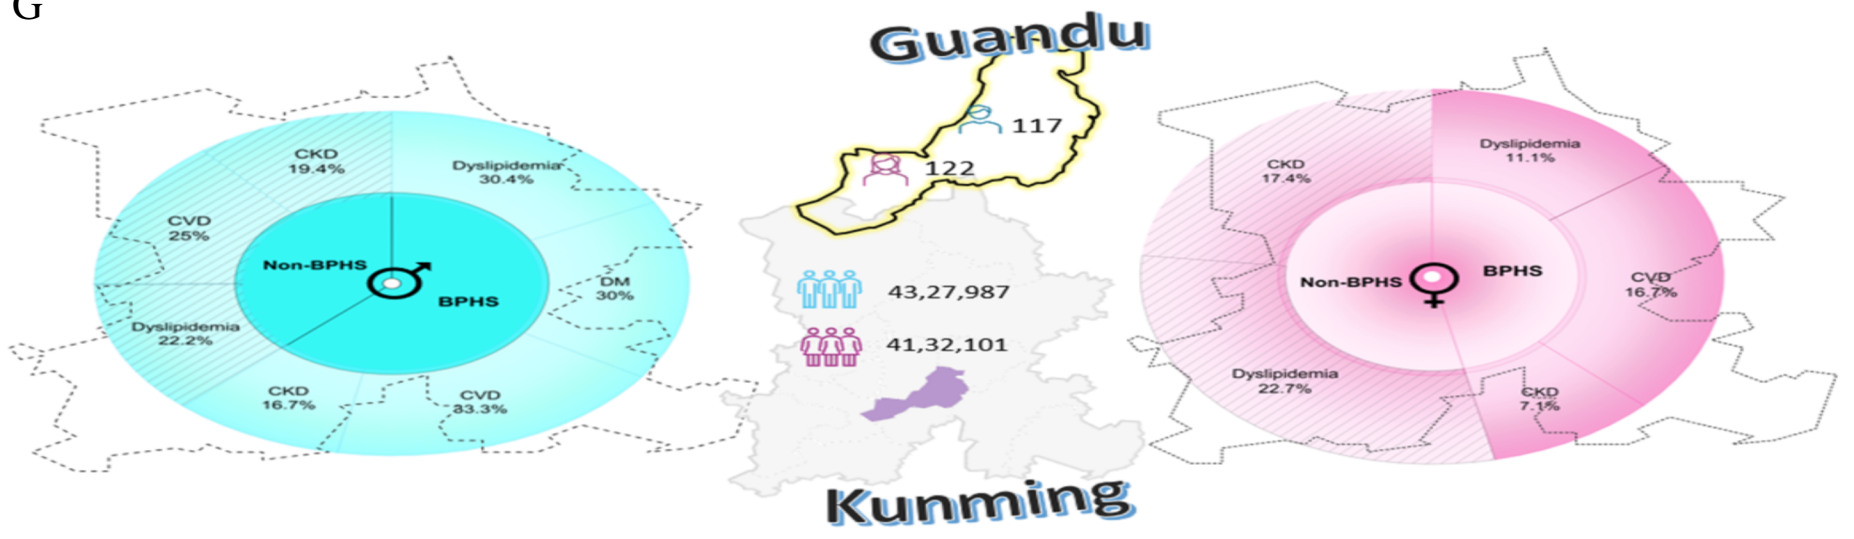

H

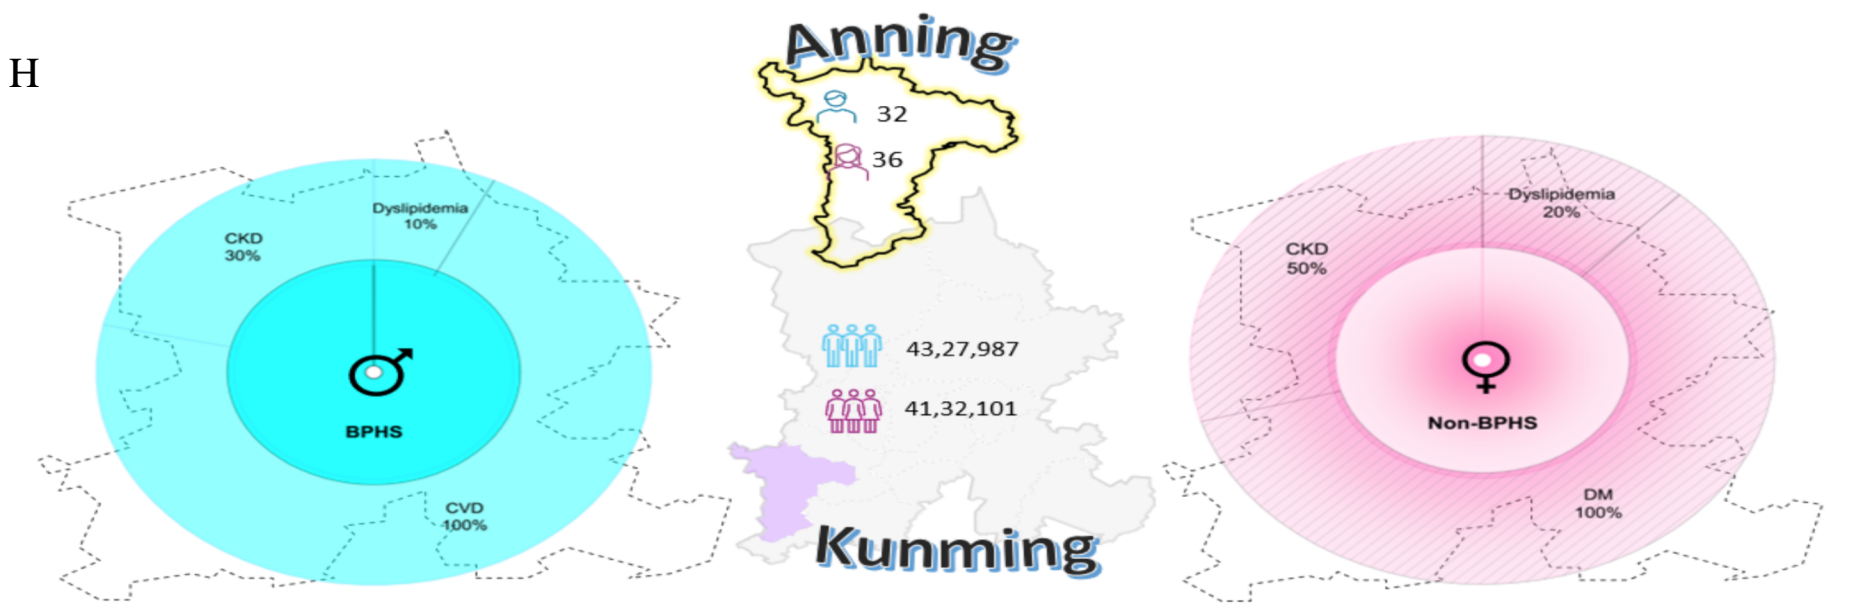

Supplement: MOESM7 [file 26741974]
